---

# Operative Andrology

---

Guest Editors

*D. Hauri*, Zürich

*W. Weidner*, Giessen

52 figures, 6 in color, 14 tables, 2003

**KARGER**

Basel · Freiburg · Paris · London · New York ·  
Bangalore · Bangkok · Singapore · Tokyo · Sydney

S. Karger  
Medical and Scientific Publishers  
Basel • Freiburg • Paris • London  
New York • Bangalore • Bangkok  
Singapore • Tokyo • Sydney

#### Drug Dosage

The authors and the publisher have exerted every effort to ensure that drug selection and dosage set forth in this text are in accord with current recommendations and practice at the time of publication. However, in view of ongoing research, changes in government regulations, and the constant flow of information relating to drug therapy and drug reactions, the reader is urged to check the package insert for each drug for any change in indications and dosage and for added warnings and precautions. This is particularly important when the recommended agent is a new and/or infrequently employed drug.

All rights reserved.

No part of this publication may be translated into other languages, reproduced or utilized in any form or by any means, electronic or mechanical, including photocopying, recording, microcopying, or by any information storage and retrieval system, without permission in writing from the publisher or, in the case of photocopying, direct payment of a specified fee to the Copyright Clearance Center (see 'General Information').

© Copyright 2003 by S. Karger AG,  
P.O. Box, CH-4009 Basel (Switzerland)  
Printed in Switzerland on acid-free paper by  
Reinhardt Druck, Basel  
ISBN 3-8055-7545-9

---

**KARGER**

Fax + 41 61 306 12 34  
E-Mail [karger@karger.ch](mailto:karger@karger.ch)  
[www.karger.com](http://www.karger.com)

## Contents

---

Review

**89 Erectile Dysfunction in the Elderly Man**

Hauri, D. (Zurich)

**100 Editorial**

**101 Vasovasostomy**

Schroeder-Printzen, I.; Diemer, Th.; Weidner, W. (Giessen)

**108 Tubulovasostomy**

Pomerol, J.M. (Barcelona)

**113 Percutaneous Treatment of Varicocele**

Trombetta, C.; Liguori, G.; Bucci, S.; Ciciliato, S.; Belgrano, E. (Trieste)

**119 Sperm Retrieval Procedures and Intracytoplasmatic Spermatozoa Injection with Epididymal and Testicular Sperms**

Schwarzer, J.U.; Fiedler, K.; v. Hertwig, I.; Krüsmann, G.; Würfel, W.; Mühlen, B.; Pickl, U.; Löchner-Ernst, D. (Munich)

**124 Development of Surgical Procedures in the Treatment of Erectile Dysfunction. A Historical Overview**

Hauri, D. (Zurich)

**132 Penile Revascularization Surgery in Erectile Dysfunction**

Hauri, D. (Zurich)

**141 Contemporary Aspects of Penile Prosthesis Implantation**

Montague, D.K.; Angermeier, K.W. (Cleveland, Ohio)
